# Supplementary material for: Nitrogen Supply Drives Senescence-Related Seed Storage Protein Expression in Rapeseed Leaves
Source: MDPI journal article supplement (doi:10.3390/genes10020072), 2019-01-22
Supplement: s1 [file s1]

# Seed Storage Protein Expression in Vegetative Tissue is driven by Nitrogen Supply during Senescence in Oil Seed Rape Plants

Stefan Bieker<sup>1</sup>, Lena Riester<sup>1</sup>, Jasmin Doll<sup>1</sup>, Jürgen Franzaring<sup>2</sup>, Andreas Fangmeier<sup>2</sup>, Ulrike Zentgraf<sup>1\*</sup>

<sup>1</sup>Centre of Molecular Biology of Plants, University of Tübingen, Auf der Morgenstelle 32, D-72076 Tübingen, Germany

<sup>2</sup> Institute of Landscape and Plant Ecology, University of Hohenheim, August-von-Hartmann-Str. 3, D-70599 Stuttgart, Germany

## Correspondence:

\*Ulrike Zentgraf

[ulrike.zentgraf@zmbp.uni-tuebingen.de](mailto:ulrike.zentgraf@zmbp.uni-tuebingen.de)

## Supporting Figures

### *Supplementary Figure S1*

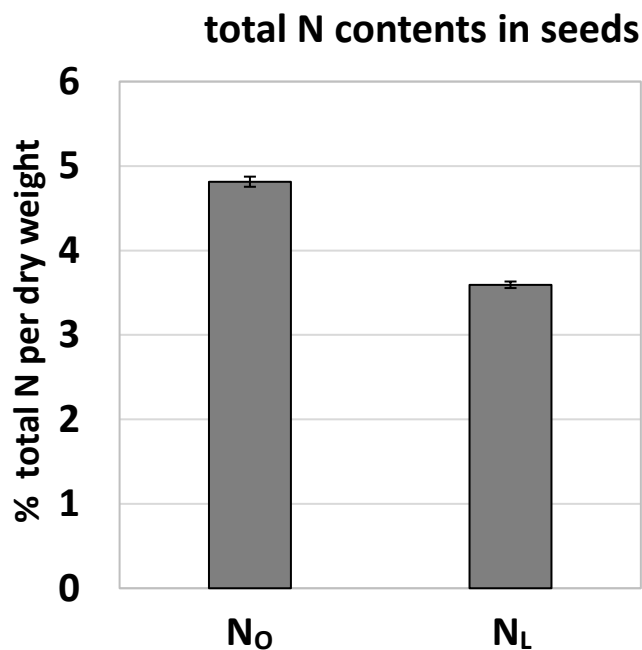

**Figure S1.** *Total N content in seeds.*

Total N content was measured by a CN-element analyser in % of the dry weight of the seeds collected from plants grown under N<sub>L</sub> and N<sub>0</sub> conditions. Error bars represent *SD* of two biological replicates.

Supplementary Figure S2

## A) Cruciferin

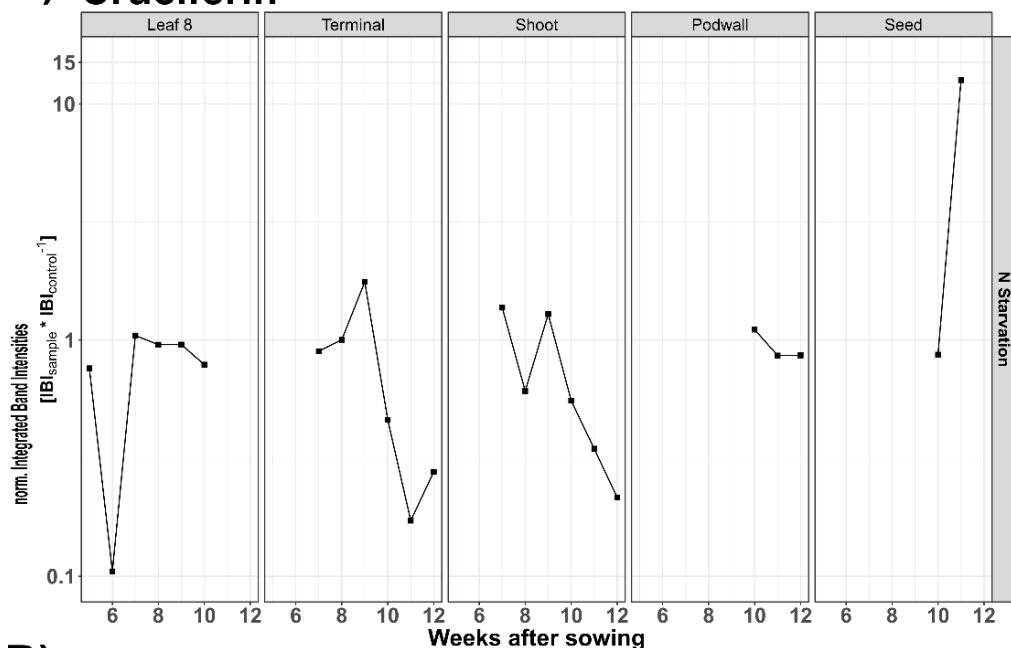

## B) Chlorophyll

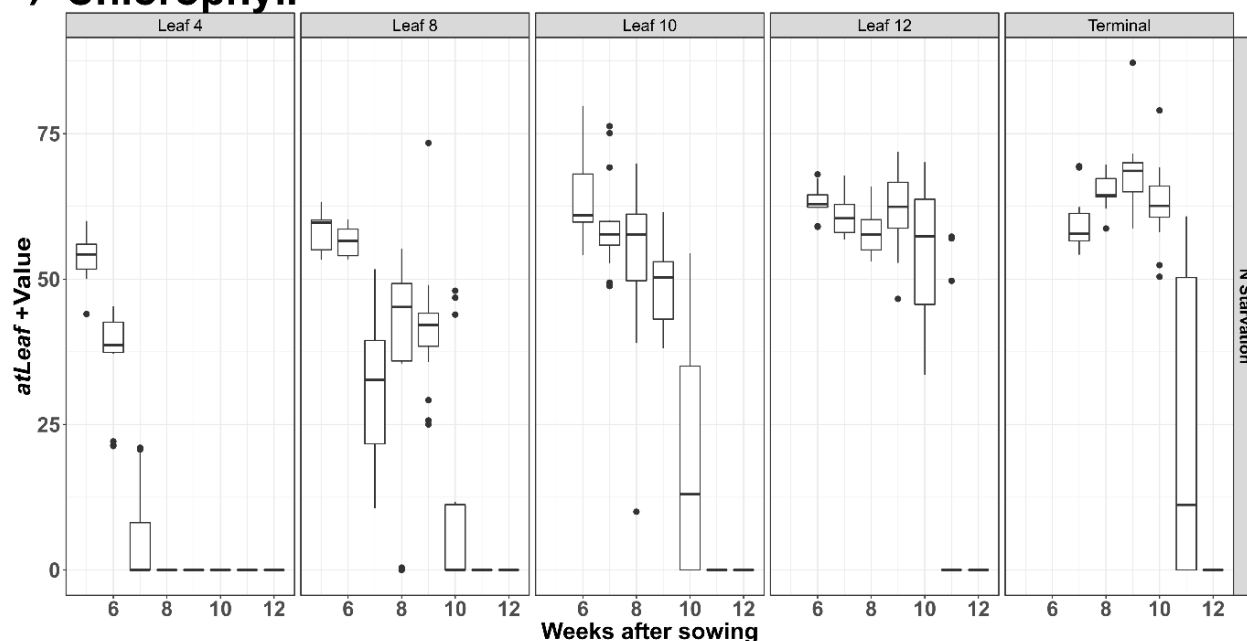

**Figure S2. Prolonged N-Starvation in *B. napus*.**

**A)** Quantification of immune-detection of CRU proteins in material from OSR (cv. Mozart) plants grown under N-starvation conditions. Accumulation of protein is barely detectable in leaf No. 8, the terminal leaf and the shoot show minimal build-ups. Seed extracts display highest accumulation of CRU proteins. **B)** Corresponding chlorophyll contents of different leaf positions of N-starved plants. Between week 5 and 7 values decreased at all analysed leaf positions. In the following weeks, leaf No. 4 is shed, all other positions exhibit an interruption of the decline or even an increase in chlorophyll content followed by a final rapid decrease before shedding. Chlorophyll contents are shown as median  $\pm$  1.5xIQR of 3 biological replicates.

*Supplementary Figure S3*

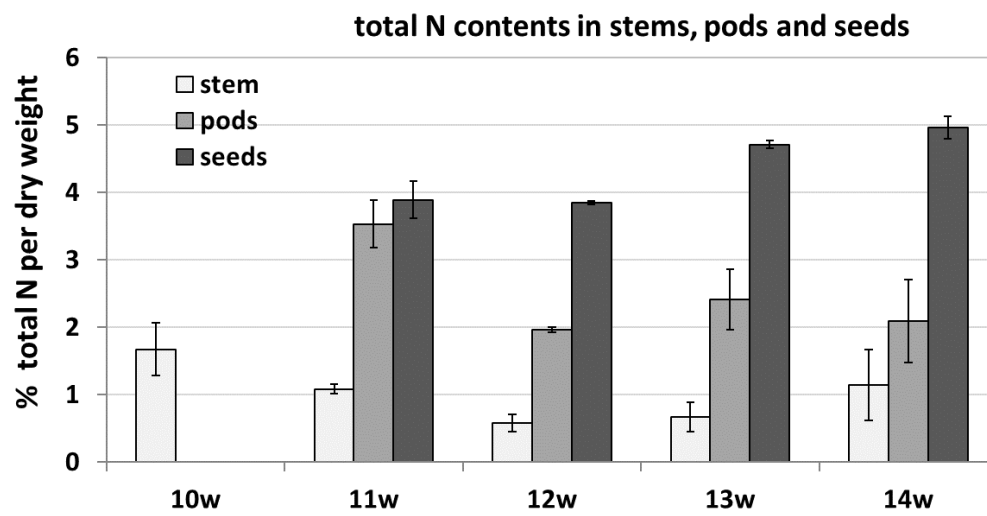

**Figure S3.** *Total N contents of stems pods and seeds.*

Total N content was measured by a CN-element analyzer in % of the dry weight of the respective tissue, stem, pods and seeds over development from week 10 to week 14. Error bars represent *SD* of two biological replicates.

*Supplementary Figure S4*

# Cruciferin

***Brassica oleracea***

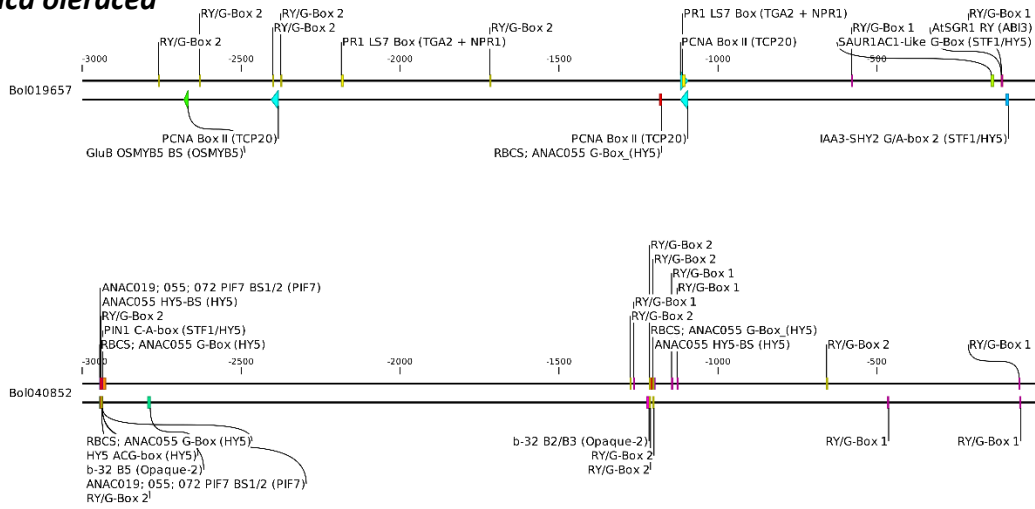

***Brassica rapa***

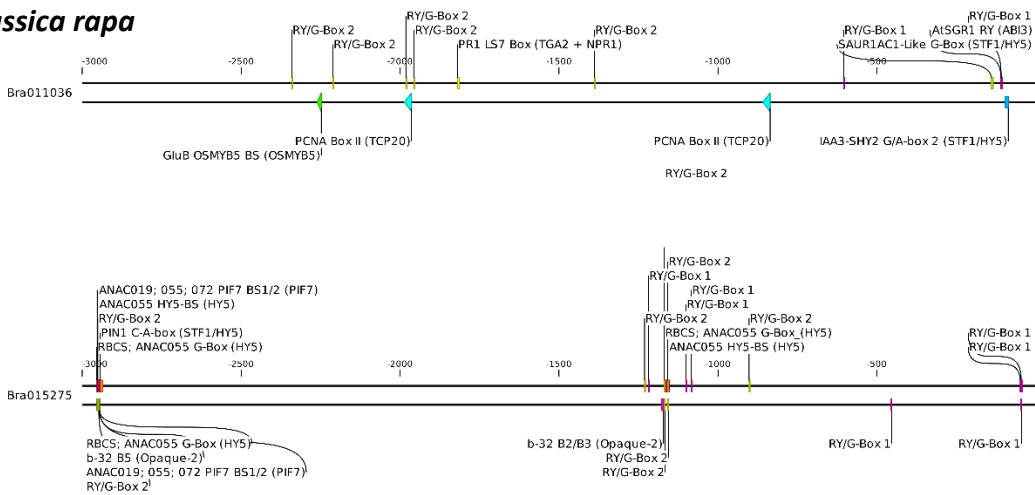

***Brassica napus***

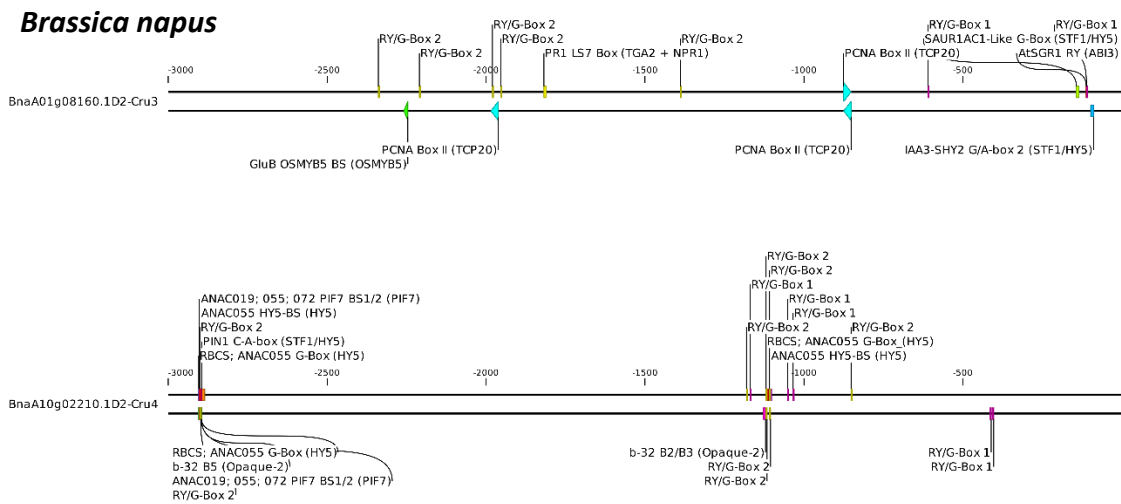

# Napin

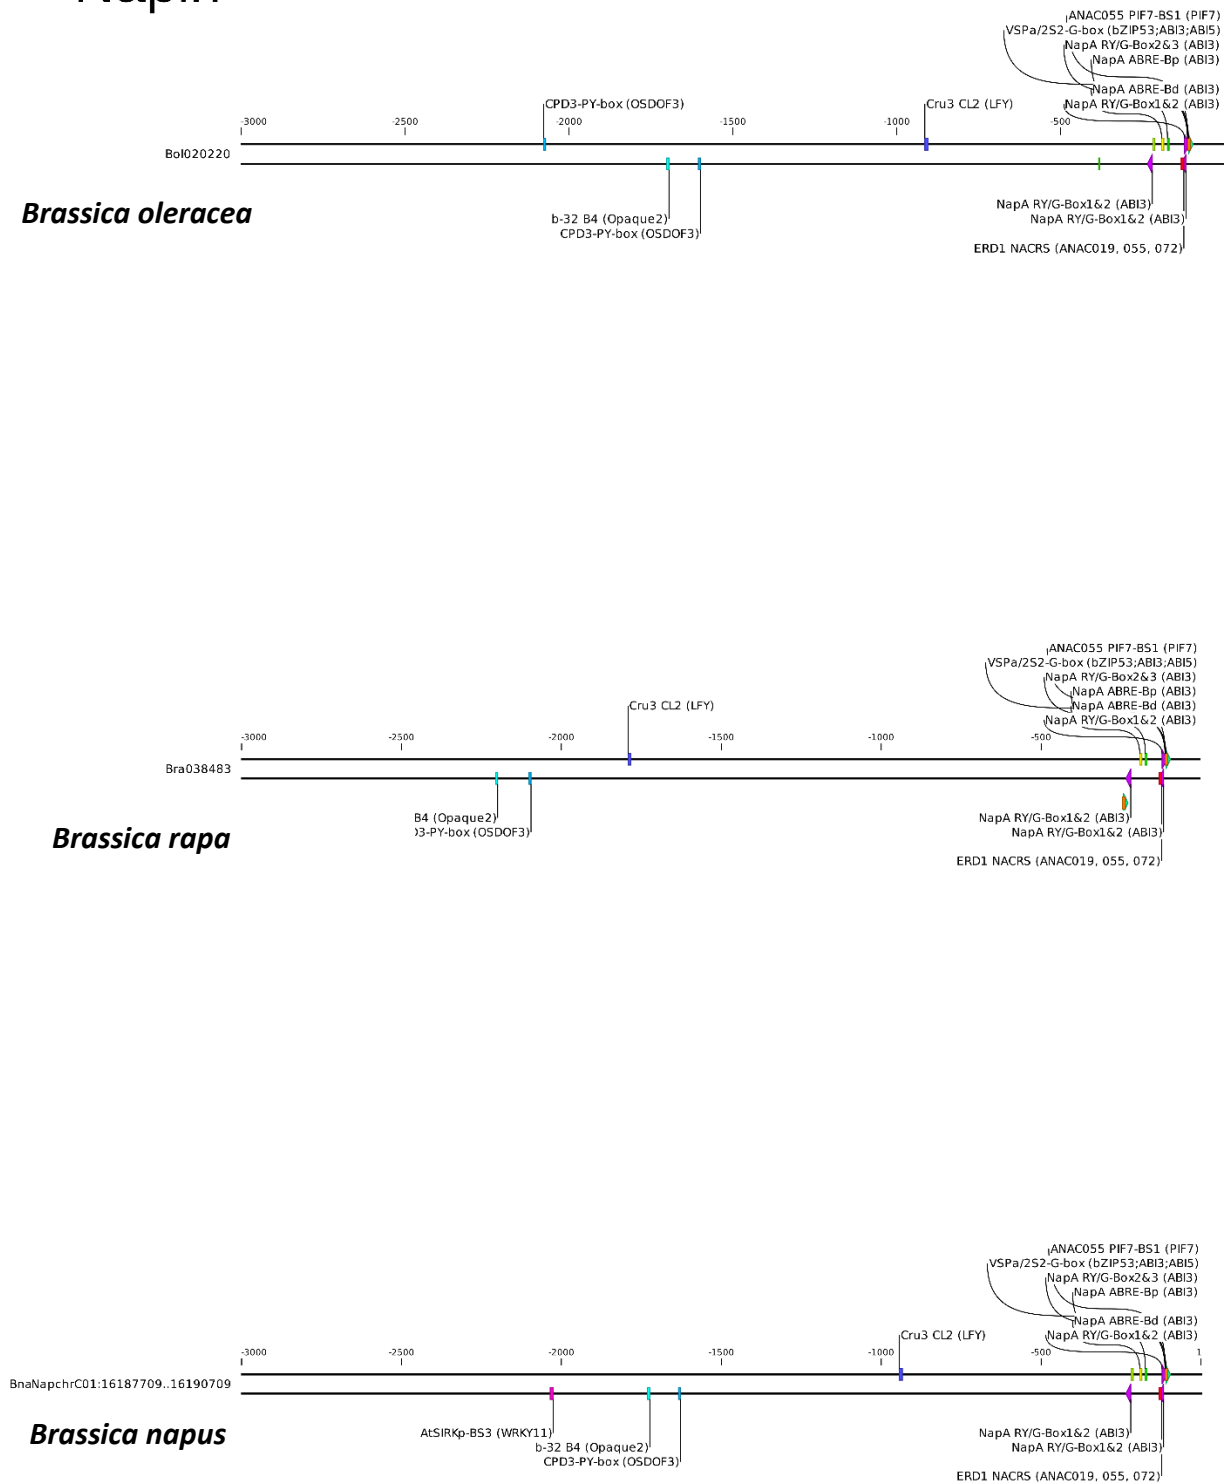

**Figure S4. Seed storage protein (SSP) promotor structure and identified binding elements.** Oilseed rape (*Brassica napus* L.) was formed ~7500 years ago by hybridization between *B. rapa* and *B. oleracea*, followed by chromosome doubling. Therefore, 3kb upstream of *B. rapa* (top) and *B. oleracea* (middle) as well as *B. napus* (bottom) *NAPIN* and *CRUCIFERIN* genomic sequences were analysed for *cis* elements. Depictions generated with CLC Main Workbench.

***Supplementary Figure S5***

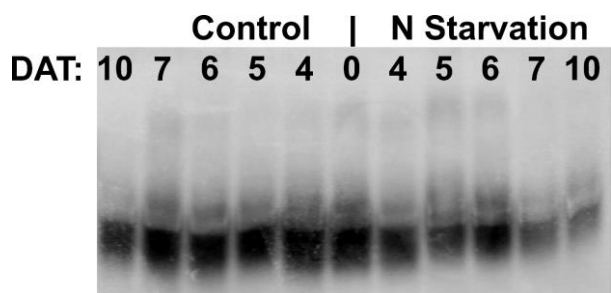

**Figure S5:** *Catalase (CAT) zymogram of nitrogen (N) starved OSR plants (cv. NPZ1).* CAT activity declines in N-starved plants from 5 DAT on (right), whereas control plants exhibit only minor variations in CAT activity over time (left). Media for N-starvation see Table S2. DAT: days after treatment. Image of CAT zymogram was transformed to grayscale and inverted.
