# Supplementary material for: Nitrogen Supply Drives Senescence-Related Seed Storage Protein Expression in Rapeseed Leaves
Source: Genes (Basel). 2019 Jan 22;10(2):72. doi: 10.3390/genes10020072 (PMC6410074; doi:10.3390/genes10020072)
Supplement: Supplementary file 1 [file genes-10-00072-s001.zip › Table S1-S5.xlsx]

## Sheet: Table S1 Hydroponic Arabidopsis
Table S1.: Hydroponic media for Nitrogen starvation experiment A. thaliana.
Component	Conc. 2nd Week [mM]	Conc. 3rd Week [mM]	Conc. 4th Week Control [mM]	Conc. 4th Week N Starvation [mM]
KH2PO4	0.5	1	1	1
MgSO4	0.5	1	1	1
K2SO4	0.125	0.25	0.25	0.25
CaCl2	0.125	0.25	0.25	0.25
KNO3	0.5	1	-	-
NH4NO3	-	-	2	-
Na-Fe-EDTA	0.05	0.1	0.1	0.1
KCl	0.05	0.05	0.05	0.05
H3BO3	0.03	0.03	0.03	0.03
MnSO4	0.005	0.005	0.005	0.005
ZnSO4	0.001	0.001	0.001	0.001
CuSO4	0.001	0.001	0.001	0.001
Na2MoO4	0.0007	0.0007	0.0007	0.0007
KOH	ad pH 5.8	ad pH 5.8	ad pH 5.8	ad pH 5.8

## Sheet:  Table S2 Hydroponic Brassica 
Table S2: Hydroponic media for Nitrogen starvation experiment B. napus.
Component	Full N Supply [mM]	N Starvation [mM]
KH2PO4	0.25	1
MgSO4	0.325	1
K2SO4	0.5	0.25
NaCl	0.05	0.05
H3BO3	0.008	0.008
ZnSO4	0.0004	0.001
CuSO4	0.0004	0.001
Na2MoO4	0.0001	0.0007
MnSO4	0.002	0.002
Ca(NO3)2	0.9	0.05
(NH4)2SO4	0.1	-
2-Cyanoguanidine	0.01	-
(C2H4N4)
CaSO4	-	1
Fe-EDDHA	0.08	0.08
CaCO3	pH ad 6	pH ad 6

## Sheet: Table S3 cis elements Napin
Table S3:	Binding elements identified with NSITE-PL in NAPIN upstream sequences. Sequences 3kb upstream of:
1. Bra038483 3KB upstream
2. Bra026375 3kb upstream
3. Bol039712 3kb upstream
4. Bol039711 3kb upstream
5. Bol020220 3kb upstream
6. BnapusNapchrA01:11088935..11091935-R
7. BnapusNapchrC01:16187709..16190709
Count	cis element	Found in	organism cis element was identified	gene cis element was identified	Trancription factor binding to the cis element	Position in NapA01	Position in NapC01
41	G-box	1;2;3;4;5;6;7	Arabidopsis (Arabidopsis thaliana); Snapdragon (Antirrhinum majus); CLCuMV DNA beta; Soybean (Glycine max)	MFT; Albumin 2S2; pallida; betaC1; LHY; vspA	ABI3; ABI5; bZIP53; GBF; unknown nuclear factor	-111	-112
15	RY G (box 1 & box 2)	1;2;3;4;5;6;7	Brassica napus	napA	ABI3	NA	NA
9	IpbHLH2 BS1	1;2;3;4;5;6;7	Common morning glory (Ipomoea purpurea)	CHS-D us1	IpbHLH2	-110	-111
9	RY G (box 2 & box 3)	1;2;3;4;5;6;7	Brassica napus	napA	ABI3	NA	NA
8	CL2	1;5;6;7	Arabidopsis (Arabidopsis thaliana); Lepidium africanum	AtCRC; LaCRC	LFY	-1786	-942
7	ACE-core (AtCFI)	1;2;3;4;5;6;7	Arabidopsis (Arabidopsis thaliana)	CFI	ACE-binding factor	-110	-111
7	GBL1 BS	1;2;3;4;5;6;7	Arabidopsis (Arabidopsis thaliana)	OLE1	B3 AFL TFs	-110	-111
7	O2 BS	1;3;5;6;7	Maize (Zea mays)	GRMZM2G091201	Opaque2 (O2)	RC: -255	-2221, RC: -256
7	PIF7 BS1	1;2;3;4;5;6;7	Arabidopsis (Arabidopsis thaliana)	ANAC055	PIF7	-110	-111
6	BC-2	1;4;4;5;6;7	Spinach (Spinacia oleracea)	RPL21	Unknown transcription factor	RC: -468	RC: -470
6	GCC-lke box	1;5;6;7	Arabidopsis (Arabidopsis thaliana)	PDF1.2	ORA59	-2773	-2829, 217
5	ABRE Bd	1;2;5;6;7	Brassica napus	napA	ABI3	-190	-191
5	ABRE Bp	1;3;5;6;7	Brassica napus	napA	ABI3	-172	-173
5	AtSIRKp (WRKY11) BS3	1;5;6;6;7	Arabidopsis (Arabidopsis thaliana)	SIRK/FRK1 (At2g19190)	WRKY11	-1723, RC: -1082	RC: -2034
5	B-box	1;3;5;6;7	Brassica napus	napA	ABI3	NA	NA
5	CRE 78-82and85-87	2;2;3;5;7	Rice (Oryza sativa. japonica)	BDP 6-5	unknown nuclear factor	NA	RC: -2461
5	E2F andDP I	1;3;5;6;7	Maize (Zea mays)	RBR3	E2F and DP	-369	-373
5	Em2	1;3;5;6;7	Wheat (Triticum aestivum)	Em	EmBP-1	-2776	-2832
5	NAC andbZIP TFs BS	1;3;5;6;7	Arabidopsis (Arabidopsis thaliana)	Synthetic oligonucleotides	NAC TF; bZIP TFs	-155	-156
5	NACRS	1;3;5;6;7	Arabidopsis (Arabidopsis thaliana)	ERD1	ANAC019; ANAC055; ANAC072	RC: -130	RC: -131
5	NON	1;2;5;7	Maize (Zea mays)	H4C7	Unknown nuclear factor	NA	RC: -966
5	PY-box	1;5;6;7	Rice (Oryza sativa)	CPD3	OSDOF3	RC: -2316	RC: -1633, C: -1427
4	AC (DkANR)	3;4;5;7	Persimmon (Diospyros kaki Thunb.)	DkANR	DkMyb2	NA	-2654
4	AC (DkLAR)	1;5;6;7	Persimmon (Diospyros kaki Thunb.)	DkLAR	DkMyb2	-336	-340
4	B4	1;5;6;7	Maize (Zea mays)	b-32	Opaque-2	RC: -2421	RC: -1730
4	C-rich Q	1;2;4;6	Tomato (Lycopersicon esculentum)	rbcS2	unknown nuclear factor	-845	NA
4	CArG (133R)	1;5;6;7	Tomato (Lycopersicon esculentum)	Genomic fragment 133R	RIN	RC: -2879	RC: -2935
4	CArG Box 2	1;3;5;7	Arabidopsis (Arabidopsis thaliana)	AGAMAOUS (AG)	unknown	NA	RC: -2692
4	CT-LB	1;5;6;7	Spinach (Spinacia oleracea)	petH	unknown nuclear factor	RC: -2178	RC: -1506
4	DOF2 domain 1	1;5;6;7	Arabidopsis (Arabidopsis thaliana)	AmidP (At4g34880)	DOF2	-277	-278
4	E1-core	1;5;6;7	Carrot (Daucus carota)	Dc3	DPBF-1	RC: -500	RC: -502
4	EM1 (CArG box 1)	1;5;6;7	Brassica oleracea	BoCRC	MADS box proteins	RC: -2381	RC: -1690
4	GT-3a Box III (3)	1;5;6;7	Arabidopsis (Arabidopsis thaliana)	cab2	GT-3a	-632	-643
4	IDE2 (1)	1;5;6;7	Rice (Oryza sativa)	AK065090	IDEF2	-534	-537
4	Myb-2	1;5;6;7	Arabidopsis (Arabidopsis thaliana)	NIA1	unknown nuclear factor	RC: -377	RC: -381
4	Myb1	1;5;6;7	Pea (Pisum sativum)	Synthetic oligonucleotides	Myb26; Myb-like DNA binding protein	RC: -322	RC: -326
4	STY1 BS (YUC8)	1;5;6;7	Arabidopsis (Arabidopsis thaliana)	YUC8 (At4g28720)	STY1	RC: -726	RC: -728
4	VP1 RE	1;5;6;7	Maize (Zea mays)	C1	unknown nuclear factor	-124	-125

## Sheet: Table S4 cis elements Cru
Table S4:	Binding elements identified with NSITE-PL in CRUCIFERIN upstream sequences. Sequences 3kb upstream of:
1. Bol019657
2. Bol040852
3. Bra011036
4. Bra015275
5. Cru3-BnaA01g08160.1D2-gene_chrA01_4845026..4848026RC
6. Cru4-BnaA10g02210.1D2-gene_chrA10_1287460..1290460
Count	cis element	Found in	organism cis element was identified	gene cis element was identified	Trancription factor binding to the cis element	Position BnaCru4	Position BnaCru3
97	G-box	1,2,3,4,5,6	Arabidopsis (Arabidopsis thaliana),Potato (Solanum tuberosum),Tobacco (Nicotiana plumbaginifolia),Snapdragon (Antirrhinum majus),Maize (Zea mays),Rice (Oryza sativa),Soybean (Glycine max)	COX5b-2 (At1g80230),Synthetic oligonucleotides,AtERF11,patatin,rbcS 8B,PNZIP,LHY,chs,AtNCED3,MFT,Albumin 2S2,PSY,GRF1,GRF2,cab1R,pallida,vspA,cab1R,chs,AtNCED3,MFT	unknown nuclear factor,AtMYC2-JIN1 (ZBF1),OsHsfA2c,OsHsfA9,GBF,AtbZIP1,PIF1,bZIP53,HY5,NtbZIP,ABI5,ABI3,ABI5,GBF,unknown nuclear factor	NA	RC: -98
17	Em1a	1,2,3,4,5,6	Maize (Zea mays),Rice (Oryza sativa, indica),Wheat (Triticum aestivum)	Em,Synthetic oligonucleotides	EmBP-1 (+VP1),OSBZ	-2903	NA
16	ERE2	1,2,3,4,5,6	Carnation (Dianthus caryophillus)	hcbt2	Unknown transcription factor	-2567 RC: -2567, C: -2713, -2115, -2050, R: -2713, -2115, -2050, -2464	-1113, -700, -348, C: -2464
13	PIF7 BS2	2,4,6	Arabidopsis (Arabidopsis thaliana)	ANAC055,ANAC019	PIF7	-2903, -1110 RC: -2903	NA
12	G-box-like	2,4,6	Medicago truncatula	CYP72a61v2,UGT73F3	TSAR1	-1121, -1110	NA
12	GBL1 BS	2,4,6	Arabidopsis (Arabidopsis thaliana)	OLE1	B3 AFL TFs	-2903 RC: -2903, -1121, -1110	NA
12	GBL2	2,4,6	Arabidopsis (Arabidopsis thaliana)	OLE1	B3 AFL TFs	-2903, -1121 RC: -2903, -1110	NA
12	PIF7 BS1	2,4,6	Arabidopsis (Arabidopsis thaliana)	ANAC019,ANAC072	PIF7	-2903 RC: -2903	NA
10	EE	1,3,5	Arabidopsis (Arabidopsis thaliana)	Synthetic oligonucleotides	RVE8,RVE1,LHY,CCA1,RVE4,RVE7,TLP11,RVE2,RVE3	NA	RC: -2918, -425
9	ABRE	2,4,6	Arabidopsis (Arabidopsis thaliana)	AtSUC1,synthetic oligonucleotides	ABA-dependent transcription factors,ABFs	-2903 RC: -2903	NA
9	Box II (CC, comp)	1,3,5	Arabidopsis (Arabidopsis thaliana)	PCNA	At-TCP20	-2362	NA
9	Box II-telo-box (motifs 1 & 2)	1,3,5	Arabidopsis (Arabidopsis thaliana)	PCNA	At-TCP20 (TCP domain transcription factor)	NA	NA
9	Telo box	1,2,3,5	Arabidopsis (Arabidopsis thaliana),Tomato (Lycopersicon esculentum)	A1 EF-1alpha	unknown nuclear factor	NA	RC: -927
8	ERE1	1,2,3,4,5,6	Carnation (Dianthus caryophillus)	hcbt2	unknown nuclear factor	RC: -2567	-1112, -699
8	ERE3	1,2,3,4,5,6	Carnation (Dianthus caryophillus)	hcbt2	Unknown transcription factor	-2567	RC: -1113, -700
7	AC1	2,4,6	Spinach (Spinacia oleracea)	rps22	unknown nuclear factor	-2903 RC: -2903	NA
7	box L	1,3,4,5,6	Parsley (Petroselinum crispum)	CCoAOMT	unknown nuclear factor	-798	-2027, -1844, -1089
7	HY5 BS	2,4,6	Arabidopsis (Arabidopsis thaliana)	ANAC055	HY5	-2903	NA
7	NON	2,4,6	Maize (Zea mays)	H3C4	Unknown nuclear factor	-1128 RC: -2459	NA
6	ABRE 1-2	1,2,3,4,5,6	Arabidopsis (Arabidopsis thaliana)	RD29B	ABI3,ABI5,AREB1	-1118	-94
6	ABRE GRA	2,4,6	Maize (Zea mays)	rab28	ABF	-1169 RC: -1485	-610
6	ABRE-6.2	2,4,6	Arabidopsis (Arabidopsis thaliana)	AtEm6	ABI5	-2903 RC: -2903	NA
6	ABRE1	1,2,3,4,5,6	Arabidopsis (Arabidopsis thaliana),Rose (Rosa hybrid)	CRC,RhNAC3	bZIP67 + LEC1-L1L-[NF-YC2],unknown nuclear factor	NA	-95
6	ABRE2	1,2,3,4,5,6	Foxtail millet (Setaria italica)	SiARDP	SiAREB1 ,SiAREB2	-1118	-94
6	ABRE5	2,4,6	Arabidopsis (Arabidopsis thaliana)	MIR168a	ABF1,ABF2,ABF3,ABF4	-2901 RC: -2903	NA
6	ACE5	2,4,6	Tobacco (Nicotiana tabacum)	synthetic oligonucleotides	unknown nuclear factor(s)	NA	NA
6	ACE5 (PP2C)	2,4,6	Arabidopsis (Arabidopsis thaliana)	PP2C (At5g59220)	unknown nuclear factor(s)	NA	NA
6	bHLH-bZIP-NAC TFs BS	2,4,6	Arabidopsis (Arabidopsis thaliana)	Synthetic oligonucleotides	bHLH, bZIP, NAC TF	-2903, -1159, -568 RC: -2903, -2456, -2161, -1121, -1110 C: -2460, -2449, -2397, -2163 R: -2612, -1954, -1943 R: -623, -153	-2697, RC: -963, -142, C: -2529, -2316, -1898, -760
6	Box II (CT, comp)	1,3,5	Arabidopsis (Arabidopsis thaliana)	PCNA	At-TCP20 (TCP domain transcription factor)	-2362	NA
6	bZIP28 BS	2,4,6	Arabidopsis (Arabidopsis thaliana)	Synthetic oligonucleotides	bZIP28	-2903 RC: -2901	NA
6	CE3	2,4,6	Rice (Oryza sativa)	Osem	TRAB1	-2903 RC: -2903	NA
6	CL2	1,3,5	Arabidopsis (Arabidopsis thaliana),Lepidium africanum	AtCRC,LaCRC	LFY	NA	RC: -1563, RC: -1563
6	CS5	2,4,6	Wheat (Triticum aestivum)	H1 (TH315)	unknown transcriptin factor	-2645	NA
6	E4-core	2,4,6	Carrot (Daucus carota)	Dc3	DPBF-1,DPBF-2	-2902 RC: -2901, -1108	NA
6	G box	2,4,6	Tomato (Lycopersicon esculentum)	RbcS-3A	GBF	-2904	NA
6	G box-1	2,4,6	Arabidopsis (Arabidopsis thaliana)	RBCS-1A	HY5,Arabidopsis bZIP protein - transcriptionl factor	-2904	NA
6	G box-2	1,2,3,4,5,6	Arabidopsis (Arabidopsis thaliana)	RbcS-1A	GBF	-1483	RC: -98
6	G-box (QPT2)	2,4,6	Tobacco (Nicotiana tabacum)	QPT2	NtMYC2	-2904, -1111 RC: -2904	NA
6	GBF1 BS3	2,4,6	Arabidopsis (Arabidopsis thaliana)	Synthetic oligonucleotides	GBF1	-2902RC: -2902	NA
6	Inr	1,3,5	Spinach (Spinacia oleracea)	RPS22,PsaDb	unknown transcriptin factor	C: -2440 C: -1299	-2074, RC: -2923, -669, C: -1573
6	IpbHLH2 BS1	2,4,6	Common morning glory (Ipomoea purpurea)	CHS-D us1	IpbHLH2	RC: -1121	NA
6	LBD motif (GRMZM2G089958_T1)	1,2,3,4,5,6	Maize (Zea mays)	GRMZM2G089958_T1	RTCS	RC: -2465	-547
6	TATA box	2,4,6	Oat (Avena fatua),Wheat (Triticum aestivum)	Amy2-D,Amy2-54	TBF	-18	NA
5	ABRE-1.3	2,3,4,6	Arabidopsis (Arabidopsis thaliana)	AtEm1	ABI5	-2893	NA
5	AE box 2	1,3,5	Arabidopsis (Arabidopsis thaliana)	GapB	AEF	-1849	-2236, -1142
5	AT-1 (2)	1,2,4,6	Tomato (Lycopersicon esculentum)	rbcS-3A	unknown nuclear factor	RC: -1089	NA
5	Box I	2,4,6	Soybean (Glycine max)	vspA	unknown nuclear factor	-2093, -1035	NA
5	CM4	2,4,6	Arabidopsis (Arabidopsis thaliana)	CBF2	CAMTA3	-2903 RC: -2903, -1121	NA
5	EE (TOC1)	1,3,5	Green Unicellular Alga (Ostreococcus tauri)	TOC1	CCA1	NA	RC: -2918, -425
5	EE1	1,3,5	Arabidopsis (Arabidopsis thaliana)	GI	unknown nuclear factor	NA	RC: -2918, -425
5	EE2	1,3,5	Arabidopsis (Arabidopsis thaliana)	GI	unknown nuclear factor	NA	-2918, -425
5	EE3	1,3,5	Arabidopsis (Arabidopsis thaliana)	GI	unknown nuclear factor	NA	-2918, -425
5	LBD motif (GRMZM2G339203_T01)	2,4,6	Maize (Zea mays)	GRMZM2G339203_T01	RTCS	-2903 RC: -2903, -1121 C: -39	-2586, -547, RC: -142
5	NAC TF BS	2,4,6	Arabidopsis (Arabidopsis thaliana)	Synthetic oligonucleotides	NAC TF	-1129 RC: -2753	NA
5	RY-G (box 2 & box 3)	2,4,6	Brassica napus	napA	ABI3	NA	NA
4	ABF3-ABF4 BS3	2,4,6	Arabidopsis (Arabidopsis thaliana)	ANAC055	ABF3,ABF4	RC: -2907	NA
4	ACE 1	2,3,4,6	Parsley (Petroselinum crispum)	PcACO-IV	2 unknown noncooperative nuclear factors	-2893	NA
4	ACG-box	2,4,6	Arabidopsis (Arabidopsis thaliana)	HY5	HY5	NA	NA
4	AT-1	1,3,4,6	Pine (Pinus sylvestris)	GS1a	nuclear proteins from cotyledons	RC: -1089 C: -2595 R: -2595	NA
4	AT-1 (3)	1,2,4,6	Tobacco (Nicotiana plumbaginifolia)	cab-E	unknown nuclear factor	-160	NA
4	B5	2,4,6	Maize (Zea mays)	b-32	Opaque-2	RC: -2904	NA
4	box II	2,4,6	Tomato (Lycopersicon esculentum)	RbcS-3.6	GBF	NA	NA
4	DNase I-footprint 3	2,4,6	French bean (Phaseolus vulgaris)	grp1.8	unknown nuclear factor	RC: -2905	NA
4	GARP BS 1	1,4,5,6	Arabidopsis (Arabidopsis thaliana)	AGAMOUS (AG)	GARP transcription factors	-1849	-1142
4	GDD1 BS	2,4,6	Rice (Oryza sativa)	KO2	BC12-GDD1	-2606	C: -2317
4	HSE4	2,4,6	Tomato (Lycopersicon esculentum)	LeftsH6	tomato HsfA2	NA	NA
4	KNOX BS (Zm ga2ox1)	2,4,6	Maize (Zea mays)	Zm ga2ox1	KNOX ,GN1,LG3	-1512	NA
4	LS7	1,3,5	Arabidopsis (Arabidopsis thaliana)	PR-1	TGA2, by assistance (enhancement) of NPR1-NIM1 protein	C: -1403 R: -1403	-1818
4	NICE element 2	1,3,5	Sesbania rostrata	Srglb3	unknown nuclear factor	NA	-2944
4	Oct(II)	1,2,4,6	Arabidopsis (Arabidopsis thaliana)	H4A748	NtWLIM2	-1121	NA
4	RPS-1	1,2,4,6	Rice (Oryza sativa)	RPBF (OsDof3)	unknown transcriptin factor	RC: -2790	NA
4	S3	2,4,6	Arabidopsis (Arabidopsis thaliana)	FT	unknown nuclear factor	-2903 RC: -2903 R: -2496	C: -978
4	TCP8 BS	2,3,4,6	Arabidopsis (Arabidopsis thaliana)	ICS1	TCP8	RC: -2138	NA
4	UN U2	1,2,4,6	Tomato (Lycopersicon esculentum)	rbcS3C	unknown nuclear factor	RC: -276	NA
4	W-box 3	3,4,5,6	Arabidopsis (Arabidopsis thaliana)	MYB2	WRKY40	RC: -2734	RC: -2874
3	13 bp CytRE	1,3,5	Cucumber (Cucumis sativus)	hpr-A	unknown nuclear factor	NA	-675
3	13 bp-box	1,3,5	Tobacco (Nicotiana tabacum)	LTR-Tto1	unknown nuclear factor	NA	RC: -1090
3	15 Z	1,3,5	Tomato (Lycopersicon esculentum)	rbcS3C	unknown nuclear factor	NA	RC: -1533
3	2&3 U	2,4,6	Tomato (Lycopersicon esculentum)	rbcS2	unknown nuclear factor	-2913	NA
3	ABF4 BS	2,4,6	Arabidopsis (Arabidopsis thaliana)	ANAC019	ABF4	RC: -2907	NA
3	ABRE 3	2,4,6	Arabidopsis (Arabidopsis thaliana)	RD29B	ABI3,ABI5,AREB1	-2900 RC: -2903	NA
3	ABRE A2; ABRE2	1,3,5	Barley (Hordeum vulgare)	HVA1 gene	unknown nuclear factor	NA	-97
3	adjb	1,3,5	Tobacco (Nicotiana tabacum)	RNP2	unknown nuclear factor	C: -2688, -2538 R: -2688, -2538	-207
3	Alfin1 BS1	1,3,5	Alfalfa (Medicago sativa)	MSPRP2	Alfin1	NA	-1457
3	Alfin1 BS2	2,4,6	Alfalfa (Medicago sativa)	MSPRP2	Alfin1	-1191	NA
3	AT1-box	2,4,6	Pea (Pisum sativum)	TOP2	unknown transcription factor	-960	NA
3	AtSGR1-RY	1,3,5	Arabidopsis (Arabidopsis thaliana)	AtSGR1	ABI3	NA	-112
3	B2	2,4,6	Maize (Zea mays)	b-32	Opaque-2	RC: -1128	NA
3	B3	2,4,6	Maize (Zea mays)	b-32	Opaque-2	RC: -1128	NA
3	BC-2	2,4,6	Spinach (Spinacia oleracea)	RPL21	Unknown transcription factor	-142	NA
3	BOX 2	2,4,6	Oat (Avena fatua)	alpha-Amy2-A	unknown nuclear factor	-2568	NA
3	box c	1,3,5	Maize (Zea mays)	cyPPDK1	DOF1	NA	-138
3	Box II	2,4,6	Pea (Pisum sativum)	rbcS-3.6	unknown transcriptin factor	NA	NA
3	Box L	1,3,5	Parsley (Petroselinum crispum)	PAL-1	unknown nuclear factor	NA	-1089
3	box-L5	1,3,5	Carrot (Daucus carota)	DcPAL1	DcMYB1	NA	-1089
3	C-A-box	2,4,6	Arabidopsis (Arabidopsis thaliana)	PIN1 (At1g73590)	STF1-HY5	-2894	NA
3	CE1-like (2)	1,3,5	Arabidopsis (Arabidopsis thaliana)	DGAT1	ABI4	NA	-1434
3	CUF-1 BS	1,3,5	Arabidopsis (Arabidopsis thaliana)	CAB2	CUF-1	NA	RC: -97, RC: -97
3	D1	2,4,6	Arachis hypogea bean (Phaseolus vulgaris)	GH3	PvAlf	-2902	NA
3	DR5	1,3,5	Soybean (Glycine max)	synthetic oligonucleotides	ARF1	NA	-524
3	DRE1	2,4,6	Sunflower (Helianthus annuus)	sHSP	HaDREB2	-10	NA
3	DRE2	2,4,6	Sunflower (Helianthus annuus)	sHSP	HaDREB2	-10	NA
3	E-box E	1,3,5	Arabidopsis (Arabidopsis thaliana)	BAS1 (At2g26710)	BZR1	NA	-2341
3	E2F1 BS	2,4,6	Maize (Zea mays)	SHR2	E2F1	RC: -2513	NA
3	E3.2	2,4,6	Rice (Oryza sativa)	SAG39	unknown nuclear factor	-1010 R: -2125	NA
3	EBS3	1,3,5	Arabidopsis (Arabidopsis thaliana	PIF3	EIN3	C: -2264 R: -2264	-881
3	Fp11-III	2,4,6	Soybean (Glycine max)	CHS8	unknown nuclear factor	-915	NA
3	Fp24-IV	1,3,5	Soybean (Glycine max)	CHS8	unknown nuclear factor	NA	-2136
3	G-A-box (2)	1,3,5	Arabidopsis (Arabidopsis thaliana)	IAA3-SHY2 (At1g04240)	STF1-HY5	NA	RC: -98
3	G-box (1)	1,3,5	Arabidopsis (Arabidopsis thaliana)	SAUR-AC1-like (At3g60690)	STF1-HY5	-2902 RC: -2902	NA
3	G-box motif	1,3,5	Rice (Oryza sativa)	Amy3D	unknown nuclear factor	NA	-96
3	GA-2	1,3,5	Arabidopsis (Arabidopsis thaliana)	STK	BPC1	NA	RC: -731, RC: -731
3	GATA motif	1,3,5	Rice (Oryza sativa) tungro bacillform virus (RTBV plant pararetrovirus)	RTBV promoter	R-GATA, GATA motif binding factor	NA	-579
3	GBF1 BS5	1,3,5	Arabidopsis (Arabidopsis thaliana)	Synthetic oligonucleotides	GBF1	NA	-141
3	GBF1 BS6	1,3,5	Arabidopsis (Arabidopsis thaliana)	Synthetic oligonucleotides	GBF1	NA	-96
3	GC-rich motif	1,3,5	Phaseolus vulgaris	beta-phaseolin, or phas	unknown nuclear factor	NA	-546
3	GCC-consensus	2,4,6	Arabidopsis (Arabidopsis thaliana)	Synthetic oligonucleotides	ERF1	RC: -2466	NA
3	GLK2 BS	1,3,5	Maize (Zea mays)	OPT	GLK2	NA	RC: -368
3	GmMYB92 BS3	1,3,5	Soybean (Glycine max)	Synthetic oligonucleotides	GmMYB92	NA	-1089
3	H-box-like motif	1,3,5	Snapdragon (Antirrhinum majus)	CHS	peyal-specific nuclear factor	NA	RC: -2323
3	I-box	2,4,6	Pea (Pisum sativum)	TOP2	unknown transcription factor	-960	NA
3	Inr element	2,4,6	Wheat (Triticum aestivum)	Amy2-54,Amy2-54	unknown	-18	NA
3	inverted telo box	1,3,5	Arabidopsis (Arabidopsis thaliana)	A-p40	unknown factor	NA	-928
3	IpMYB1 BS2	1,3,5	Common morning glory (Ipomoea purpurea)	CHS-D us1	IpMYB1	NA	RC: -2323
3	KN1-KIP BS	2,4,6	Maize (Zea mays)	Synthetic oligonucleotides	KN1-KIP	-1504	NA
3	MdMYB9 BS (MdANR)	2,4,6	Apple (Malus x domestica)	MdANR	MdMYB9	-1110	NA
3	Motif I core	1,3,5	Rice (Oryza sativa)	rab16A-D	TAF-1,transacting factor	NA	-95
3	MRE (ANAC13)	1,3,5	Arabidopsis (Arabidopsis thaliana)	ANAC13 (At1g32870)	NSP1	NA	-87
3	MYCS (NtPT3)	1,3,5	Tobacco (Nicotiana tabacum)	NtPT3	MYC	NA	-2394
3	MYCS (NtPT4)	1,3,5	Tobacco (Nicotiana tabacum)	NtPT4	MYC	NA	-2394
3	MYCS (SmPT4)	1,3,5	Eggplant (Solanum melongena)	SmPT4	MYC	NA	-2394
3	MYCS (SmPT5)	1,3,5	Eggplant (Solanum melongena)	SmPT5	MYC	NA	-2394
3	Oct (r)	1,3,5	Wheat (Triticum aestivum)	H3	unknown nuclear factor	NA	RC: -2415
3	OSMYB5 BS (P)	1,3,5	Rice (Oryza sativa)	GluB-1	OSMYB5	NA	RC: -2259
3	P1BS	1,3,5	Arabidopsis (Arabidopsis thaliana)	AtIPS3	PHR1	NA	RC: -2162
3	P1BS (SmPT4)	1,3,5	Eggplant (Solanum melongena)	SmPT4	PHR1 (P1)	NA	-2162
3	PacC BS1	2,4,6	Humicola gricea	pacC	PacC	-2300	NA
3	Palindrome 1	1,3,5	Fusarium solani f. sp, pisi (Nectria haematococca)	Cutinase	PBP	NA	-2527
3	REB1	1,3,5	Rice (Oryza sativa)	alpha-globulin	REB	NA	RC: -97
3	Regulatory Motif 2	2,4,6	Soybean (Glycine max)	11S A2B1a	unknown seed embryo nuclear factor	-960	NA
3	RY	2,4,6	Soybean (Glycine max)	beta-conglycinin	unknown nuclear factor	-1051 RC: -415	NA
3	Site I	1,3,5	Arabidopsis (Arabidopsis thaliana)	PCNA	RPCF-1	NA	RC: -1390
3	STF1-HY5 BS (cons)	1,3,5	Arabidopsis (Arabidopsis thaliana)	Synthetic oligonucleotides	STF1-HY5 BS (cons)	NA	-143
3	telo box	1,3,5	Arabidopsis (Arabidopsis thaliana)	Cytc-1	AtPuralpha	NA	RC: -928
3	telo-box	1,3,5	Arabidopsis (Arabidopsis thaliana)	eEF1AA1	unknown nuclear factor	NA	-927
3	TELO-box	1,3,5	Arabidopsis (Arabidopsis thaliana)	AtPES	unknown nuclear factor	NA	RC: -928
3	Telo-box	1,3,5	Rice (Oryza sativa)	rpL32_8.1	unknown nuclear factor(s)	NA	RC: -928
3	TTAGGGTTTT-box	1,3,5	pea, Pisum sativum	rp L9	unknown nuclear factor	NA	-928
3	unknown	1,3,5	Arabidopsis (Arabidopsis thaliana)	AP1-15	SPL1,SPL3,SPL7,SPL8	NA	RC: -2097
						NA= not annotated
						RC=Reverse complement

## Sheet: Table S5 AGI codes SSPs
Table S5	AGI-Codes for SSP associated transcripts. The following list was obtained via keyword search in the TAIR database. Keywords included for example: seed storage, storage albumin, vacuolar processing enzyme, lipid transfer and others.
AGI Code	Annotation
AT1G03103	Bifunct. inhibitor/lipid-tranf. prot./seed storage 2S albumin superfam. prot.
AT1G03890	RmlC-like cupins superfam. prot.; FUNCTIONS IN: nutrient reservoir activity; CONTAINS InterPro DOMAIN/s: Cupin, RmlC-type (InterPro:IPR011051), Cupin 1 (InterPro:IPR006045), RmlC-like jelly roll fold (InterPro:IPR014710), 11-S seed storage protein, plant (InterPro:IPR006044);
AT1G05450	Protease inhibitor/seed storage/LTP family protein
AT1G07747	Protease inhibitor/seed storage/LTP family protein
AT1G07750	RmlC-like cupins superfam. prot.; FUNCTIONS IN: copper ion binding, zinc ion binding, nutrient reservoir activity
AT1G12100	Bifunct. inhibitor/lipid-tranf. prot./seed storage 2S albumin superfam. prot.
AT1G18280	Bifunct. inhibitor/lipid-tranf. prot./seed storage 2S albumin superfam. prot.
AT1G36150	Bifunct. inhibitor/lipid-tranf. prot./seed storage 2S albumin superfam. prot.
AT1G43665	Bifunct. inhibitor/lipid-tranf. prot./seed storage 2S albumin superfam. prot.
AT1G43666	Bifunct. inhibitor/lipid-tranf. prot./seed storage 2S albumin superfam. prot.
AT1G43667	Bifunct. inhibitor/lipid-tranf. prot./seed storage 2S albumin superfam. prot.
AT1G48750	Bifunct. inhibitor/lipid-tranf. prot./seed storage 2S albumin superfam. prot.
AT1G52415	Bifunct. inhibitor/lipid-tranf. prot./seed storage 2S albumin superfam. prot.
AT1G55260	Bifunct. inhibitor/lipid-tranf. prot./seed storage 2S albumin superfam. prot.
AT1G62500	Bifunct. inhibitor/lipid-tranf. prot./seed storage 2S albumin superfam. prot.
AT1G62510	Bifunct. inhibitor/lipid-tranf. prot./seed storage 2S albumin superfam. prot.
AT1G62790	Bifunct. inhibitor/lipid-tranf. prot./seed storage 2S albumin superfam. prot.
AT1G64235	Bifunct. inhibitor/lipid-tranf. prot./seed storage 2S albumin superfam. prot.
AT1G66850	Bifunct. inhibitor/lipid-tranf. prot./seed storage 2S albumin superfam. prot.
AT1G70250	Protease inhibitor/seed storage/LTP family protein
AT1G73550	Protease inhibitor/seed storage/LTP family protein
AT1G73560	Bifunct. inhibitor/lipid-tranf. prot./seed storage 2S albumin superfam. prot.
AT1G73780	Bifunct. inhibitor/lipid-tranf. prot./seed storage 2S albumin superfam. prot.
AT1G73890	Bifunct. inhibitor/lipid-tranf. prot./seed storage 2S albumin superfam. prot.
AT1G76965	Protease inhibitor/seed storage/LTP family protein
AT2G10940	Bifunct. inhibitor/lipid-tranf. prot./seed storage 2S albumin superfam. prot.
AT2G13295	Protease inhibitor/seed storage/LTP family protein
AT2G13820	Bifunct. inhibitor/lipid-tranf. prot./seed storage 2S albumin superfam. prot.
AT2G14846	Bifunct. inhibitor/lipid-tranf. prot./seed storage 2S albumin superfam. prot.
AT2G16592	Protease inhibitor/seed storage/LTP family protein
AT2G16594	Protease inhibitor/seed storage/LTP family protein
AT2G19560	Protein with a PAM domain involved in ethylene signaling. eer5 mutants show ethylene hypersensitivity in relation to hypocotyl elongation.
AT2G27130	Bifunct. inhibitor/lipid-tranf. prot./seed storage 2S albumin superfam. prot.
AT2G28680	RmlC-like cupins superfam. prot.; FUNCTIONS IN: nutrient reservoir activity;
AT2G37870	Bifunct. inhibitor/lipid-tranf. prot./seed storage 2S albumin superfam. prot.
AT2G44290	Bifunct. inhibitor/lipid-tranf. prot./seed storage 2S albumin superfam. prot.
AT2G44300	Bifunct. inhibitor/lipid-tranf. prot./seed storage 2S albumin superfam. prot.
AT2G45180	Bifunct. inhibitor/lipid-tranf. prot./seed storage 2S albumin superfam. prot.
AT2G46020	SWI/SNF chromatin remodeling ATPase that upregulates transcription of all three CUC genes and is involved in the formation and/or maintenance of boundary cells during embryogenesis. Also mediates repression of expression of seed storage proteins in vegetative tissues. Interacts strongly with AtSWI3C, also with AtSWI3B, but not with AtSWI3A or AtSWI3D.
AT2G48130	Bifunct. inhibitor/lipid-tranf. prot./seed storage 2S albumin superfam. prot.
AT2G48140	embryo sac development arrest 4 (EDA4); CONTAINS InterPro DOMAIN/s: Bifunct. inhibitor/plant lipid transfer protein/seed storage (InterPro:IPR016140), Plant lipid transfer protein/seed storage/trypsin-alpha amylase inhibitor (InterPro:IPR003612); BEST Arabidopsis thaliana protein match is: Bifunct. inhibitor/lipid-tranf. prot./seed storage 2S albumin superfam. prot. (TAIR:AT1G05450.2)
AT3G07450	Bifunct. inhibitor/lipid-tranf. prot./seed storage 2S albumin superfam. prot.
AT3G11825	Protease inhibitor/seed storage/LTP family protein
AT3G12545	Bifunct. inhibitor/lipid-tranf. prot./seed storage 2S albumin superfam. prot.
AT3G18280	Bifunct. inhibitor/lipid-tranf. prot./seed storage 2S albumin superfam. prot.
AT3G18845	Protease inhibitor/seed storage/LTP family protein [pseudogene]
AT3G22142	Protease inhibitor/seed storage/LTP family protein
AT3G22570	Bifunct. inhibitor/lipid-tranf. prot./seed storage 2S albumin superfam. prot.
AT3G22580	Bifunct. inhibitor/lipid-tranf. prot./seed storage 2S albumin superfam. prot.
AT3G22600	Bifunct. inhibitor/lipid-tranf. prot./seed storage 2S albumin superfam. prot.
AT3G22620	Bifunct. inhibitor/lipid-tranf. prot./seed storage 2S albumin superfam. prot.
AT3G23645	Protease inhibitor/seed storage/LTP family protein [pseudogene]
AT3G29152	Protease inhibitor/seed storage/LTP family protein
AT3G43720	Bifunct. inhibitor/lipid-tranf. prot./seed storage 2S albumin superfam. prot.
AT3G47700	Involved in transportation of seed storage proteins from the ER to the vacuole. Mutant seed cell accumulates the precursors of 12S globulin and 2S albumin instead of the vacuolar-located mature proteins.
AT3G52130	Bifunct. inhibitor/lipid-tranf. prot./seed storage 2S albumin superfam. prot.
AT3G52850	Encodes the Vacuolar Sorting Receptor-1 (VSR-1)/Epidermal Growth Factor Receptor-like protein1(VSR-1/ATELP1). Binds vacuolar targeting signals. Involved in sorting seed storage proteins into vacuoles.
AT3G53980	Bifunct. inhibitor/lipid-tranf. prot./seed storage 2S albumin superfam. prot.
AT3G57310	Bifunct. inhibitor/lipid-tranf. prot./seed storage 2S albumin superfam. prot.
AT3G58550	Bifunct. inhibitor/lipid-tranf. prot./seed storage 2S albumin superfam. prot.
AT3G59455	Protease inhibitor/seed storage/LTP family protein
AT3G63095	Protease inhibitor/seed storage/LTP family protein
AT4G00165	Bifunct. inhibitor/lipid-tranf. prot./seed storage 2S albumin superfam. prot.
AT4G08670	Bifunct. inhibitor/lipid-tranf. prot./seed storage 2S albumin superfam. prot.
AT4G12360	Bifunct. inhibitor/lipid-tranf. prot./seed storage 2S albumin superfam. prot.
AT4G12490	Bifunct. inhibitor/lipid-tranf. prot./seed storage 2S albumin superfam. prot.
AT4G12500	Bifunct. inhibitor/lipid-tranf. prot./seed storage 2S albumin superfam. prot.
AT4G12510	Bifunct. inhibitor/lipid-tranf. prot./seed storage 2S albumin superfam. prot.;
AT4G12520	Bifunct. inhibitor/lipid-tranf. prot./seed storage 2S albumin superfam. prot.
AT4G12530	Bifunct. inhibitor/lipid-tranf. prot./seed storage 2S albumin superfam. prot.
AT4G12545	Bifunct. inhibitor/lipid-tranf. prot./seed storage 2S albumin superfam. prot.
AT4G12825	Protease inhibitor/seed storage/LTP family protein
AT4G14805	Bifunct. inhibitor/lipid-tranf. prot./seed storage 2S albumin superfam. prot.
AT4G14815	Bifunct. inhibitor/lipid-tranf. prot./seed storage 2S albumin superfam. prot.
AT4G15160	Bifunct. inhibitor/lipid-tranf. prot./seed storage 2S albumin superfam. prot.
AT4G22460	Bifunct. inhibitor/lipid-tranf. prot./seed storage 2S albumin superfam. prot.
AT4G22470	Protease inhibitor/seed storage/LTP family protein
AT4G22485	Protease inhibitor/seed storage/LTP family protein
AT4G22490	Bifunct. inhibitor/lipid-tranf. prot./seed storage 2S albumin superfam. prot.
AT4G22505	Bifunct. inhibitor/lipid-tranf. prot./seed storage 2S albumin superfam. prot.
AT4G22513	Protease inhibitor/seed storage/LTP family protein
AT4G22517	Protease inhibitor/seed storage/LTP family protein
AT4G22520	Bifunct. inhibitor/lipid-tranf. prot./seed storage 2S albumin superfam. prot.
AT4G22610	Bifunct. inhibitor/lipid-tranf. prot./seed storage 2S albumin superfam. prot.
AT4G22630	Bifunct. inhibitor/lipid-tranf. prot./seed storage 2S albumin superfam. prot.
AT4G22640	Bifunct. inhibitor/lipid-tranf. prot./seed storage 2S albumin superfam. prot.
AT4G22650	Hypothetical Protein; CONTAINS InterPro DOMAIN/s: Plant lipid transfer protein/seed storage/trypsin-alpha amylase inhibitor (InterPro:IPR003612); BEST Arabidopsis thaliana protein match is: Bifunct. inhibitor/lipid-tranf. prot./seed storage 2S albumin superfam. prot. (TAIR:AT4G22640.1)
AT4G22666	Bifunct. inhibitor/lipid-tranf. prot./seed storage 2S albumin superfam. prot.
AT4G27140	seed storage albumin 1 (SESA1); FUNCTIONS IN: lipid binding, nutrient reservoir activity
AT4G27150	seed storage albumin 2 (SESA2); FUNCTIONS IN: lipid binding, nutrient reservoir activity
AT4G27160	seed storage albumin 3 (SESA3); FUNCTIONS IN: lipid binding, nutrient reservoir activity
AT4G27170	seed storage albumin 4 (SESA4); FUNCTIONS IN: lipid binding, nutrient reservoir activity
AT4G28397	Unknown Protein; BEST Arabidopsis thaliana protein match is: Bifunct. inhibitor/lipid-tranf. prot./seed storage 2S albumin superfam. prot. (TAIR:AT4G28395.1)
AT4G28405	Expressed protein; BEST Arabidopsis thaliana protein match is: Bifunct. inhibitor/lipid-tranf. prot./seed storage 2S albumin superfam. prot. (TAIR:AT1G52415.1)
AT4G28520	Encodes a 12S seed storage protein that is tyrosine-phosphorylated and its phosphorylation state is modulated in response to ABA in Arabidopsis thaliana seeds.
AT4G30880	Bifunct. inhibitor/lipid-tranf. prot./seed storage 2S albumin superfam. prot.
AT4G32940	Encodes a vacuolar processing enzyme belonging to a novel group of cysteine proteinases that is expressed in vegetative organs and is upregulated in association with various types of cell death and under stressed conditions. They are essential in processing seed storage proteins and for mediating the susceptible response of toxin-induced cell death.
AT4G33550	Bifunct. inhibitor/lipid-tranf. prot./seed storage 2S albumin superfam. prot.
AT5G05960	Bifunct. inhibitor/lipid-tranf. prot./seed storage 2S albumin superfam. prot.
AT5G07230	Bifunct. inhibitor/lipid-tranf. prot./seed storage 2S albumin superfam. prot.
AT5G09370	Bifunct. inhibitor/lipid-tranf. prot./seed storage 2S albumin superfam. prot.
AT5G13900	Bifunct. inhibitor/lipid-tranf. prot./seed storage 2S albumin superfam. prot.
AT5G26015	Protease inhibitor/seed storage/LTP family protein [pseudogene]
AT5G38160	Bifunct. inhibitor/lipid-tranf. prot./seed storage 2S albumin superfam. prot.
AT5G38170	Bifunct. inhibitor/lipid-tranf. prot./seed storage 2S albumin superfam. prot.
AT5G38180	Bifunct. inhibitor/lipid-tranf. prot./seed storage 2S albumin superfam. prot.
AT5G38195	Bifunct. inhibitor/lipid-tranf. prot./seed storage 2S albumin superfam. prot.
AT5G38197	Protease inhibitor/seed storage/LTP family protein
AT5G44120	Encodes a 12S seed storage protein. The Landsberg erecta genome contains another copy of 12S globulin gene, CRA2, which is located tandemly with CRA1. Protein is tyrosine-phosphorylated and its phosphorylation state is modulated in response to ABA in Arabidopsis thaliana seeds.
AT5G44265	Protease inhibitor/seed storage/LTP family protein. Predicted to be a member of PR-14 pathogenesis-related protein family
AT5G46890	Bifunct. inhibitor/lipid-tranf. prot./seed storage 2S albumin superfam. prot.
AT5G46900	Bifunct. inhibitor/lipid-tranf. prot./seed storage 2S albumin superfam. prot.
AT5G48490	Bifunct. inhibitor/lipid-tranf. prot./seed storage 2S albumin superfam. prot.
AT5G52160	Bifunct. inhibitor/lipid-tranf. prot./seed storage 2S albumin superfam. prot.
AT5G54740	seed storage albumin 5 (SESA5); FUNCTIONS IN: lipid binding, nutrient reservoir activity
AT5G55410	Bifunct. inhibitor/lipid-tranf. prot./seed storage 2S albumin superfam. prot.
AT5G55420	Protease inhibitor/seed storage/LTP family protein [pseudogene]
AT5G55450	Bifunct. inhibitor/lipid-tranf. prot./seed storage 2S albumin superfam. prot.
AT5G55460	Bifunct. inhibitor/lipid-tranf. prot./seed storage 2S albumin superfam. prot.
AT5G56480	Bifunct. inhibitor/lipid-tranf. prot./seed storage 2S albumin superfam. prot.
AT5G59330	Bifunct. inhibitor/lipid-tranf. prot./seed storage 2S albumin superfam. prot.
AT5G62065	Protease inhibitor/seed storage/LTP family protein. Predicted to encode a PR (pathogenesis-related) protein. Belongs to the lipid transfer protein (PR-14) family
AT5G62080	Bifunct. inhibitor/lipid-tranf. prot./seed storage 2S albumin superfam. prot.
AT5G64080	Bifunct. inhibitor/lipid-tranf. prot./seed storage 2S albumin superfam. prot.
